# Supplementary material
Source: PubMed Central journal article supplement (PMC9261112)
Supplement: NIHMS1768881-supplement-1.pdf [file NIHMS1768881-supplement-1.pdf]

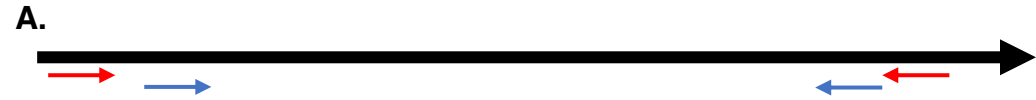

**B.**

|     |     |     |     |     |     |     |     |     |     |     |     |     |     |     |     |     |     |     |     |
|-----|-----|-----|-----|-----|-----|-----|-----|-----|-----|-----|-----|-----|-----|-----|-----|-----|-----|-----|-----|
| C   | CAG | TTC | AAG | GGC | GAG | TGC | TAC | TTC | ACC | AAC | GGG | ACG | CAG | CGC | ATA | CGA | TCT | GTG | GAC |
|     | Q   | F   | K   | G   | E   | C   | Y   | F   | T   | N   | G   | T   | Q   | R   | I   | R   | S   | V   | D   |
| AGA | TAC | ATC | TAC | AAC | CGG | GAG | GAG | TAC | CTG | CGC | TTC | GAC | AGC | GAC | GTG | GGC | GAG | TAC | CGC |
| R   | Y   | I   | Y   | N   | R   | E   | E   | Y   | L   | R   | F   | D   | S   | D   | V   | G   | E   | Y   | R   |
| GCG | GTG | ACC | GAG | CTG | GGG | CGG | CCA | GAC | CCC | GAG | TAC | TAC | AAT | AAG | CAG | TAC | CTG | GAG | CAA |
| A   | V   | T   | E   | L   | G   | R   | P   | D   | P   | E   | Y   | Y   | N   | K   | Q   | Y   | L   | E   | Q   |
| ACG | CGG | GCC | GAG | CTG | GAC | ACG | GTG | TGC | AGA | CAC | AAC | TAC | GAG | GGG | GTG | GAG | A   |     |     |
| T   | R   | A   | E   | L   | D   | T   | V   | C   | R   | H   | N   | Y   | E   | G   | V   | E   |     |     |     |

**Supplemental Figure 1.** Sequence of I-A<sup>s</sup> beta alleles from SJL/J and B10.S mice.

A. Exon 2 encoding the  $\beta$ 1 domain is shown as a black arrow. PCR primers (red arrows) were used to amplify the  $\beta$ 1 region from B10.A and SJL genomic DNA. Four independent PCR reactions were done for both B10.A and SJL/J to avoid PCR errors. The PCR product was gel purified and sequenced from both ends using internal primers (blue arrows).

B. The IA<sup>s</sup> beta chain nucleotide and corresponding protein sequence is shown and the Proline at position 58 is highlighted in red. The nucleotide sequences from B10.S and SJL/J, both purchased from Jackson laboratories were identical.

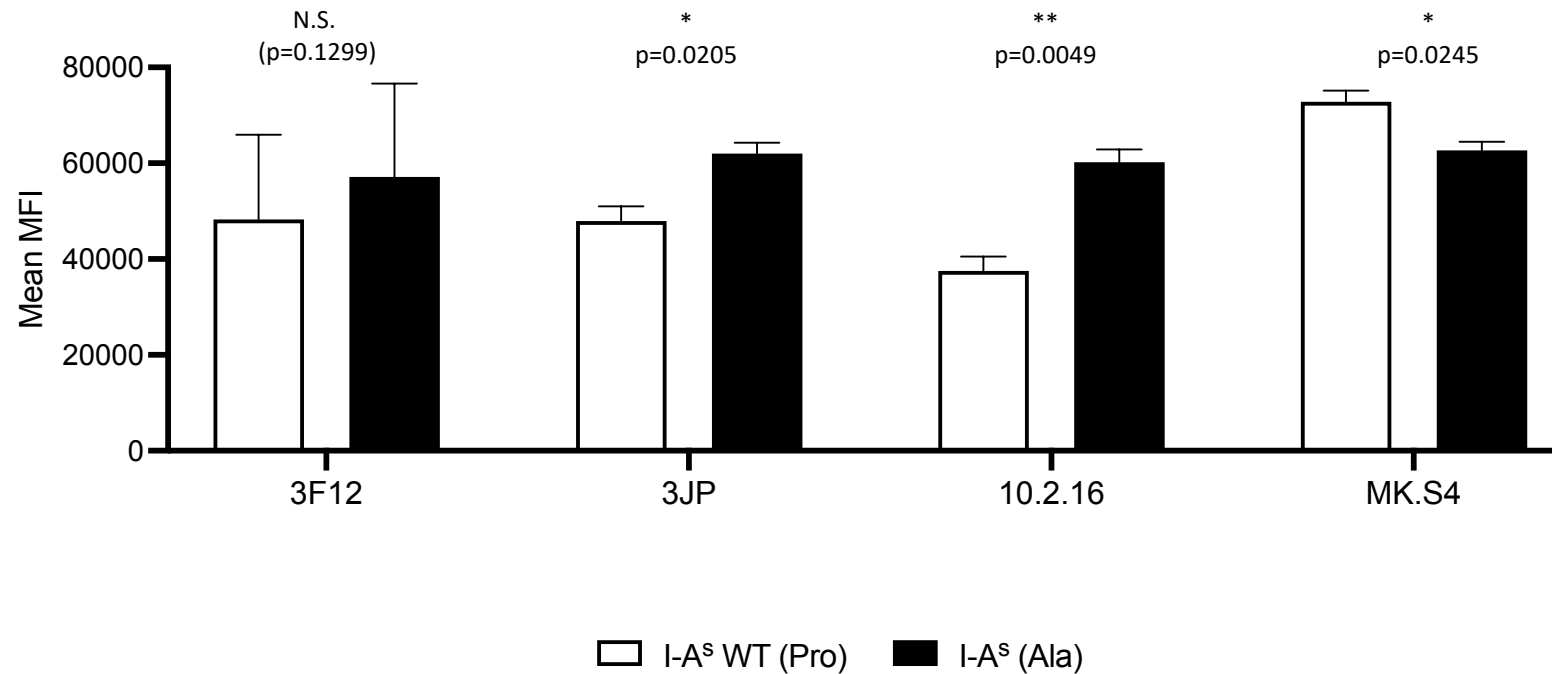

**Supplemental Figure 2.** Reactivity of APC expressing either I-A<sup>s</sup> (βPro58) or its variant I-A<sup>s</sup> (βAla58). The average of three independent experiments with the standard error of the mean is shown for the mAb reactive with both I-A<sup>s</sup> MHC class II molecules. An unpaired t-test was used to assess statistical significance.

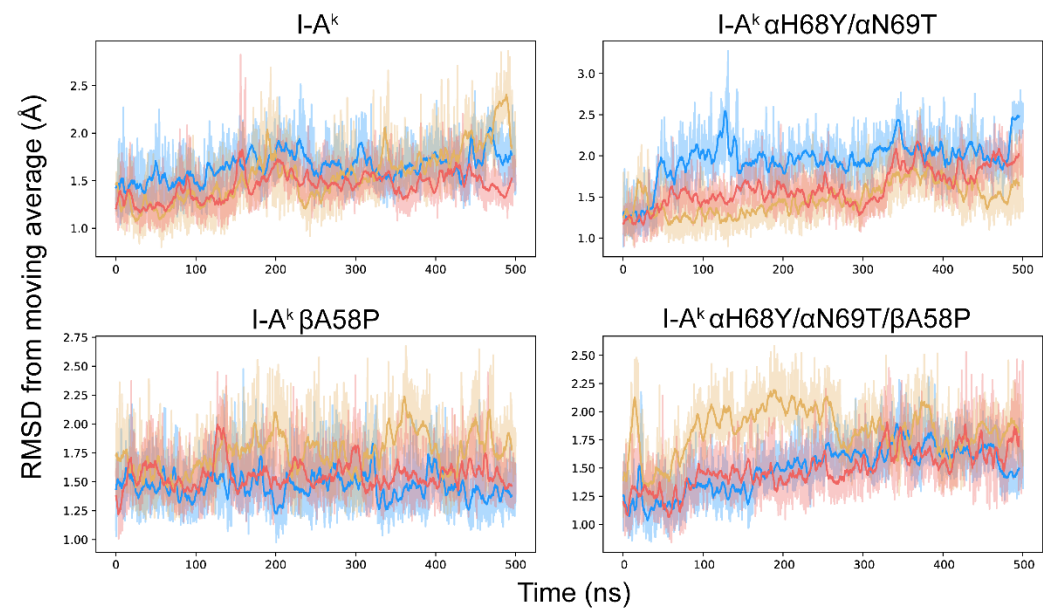

**Supplemental Figure 3** . RMS deviations (RMSD) values calculated from the average structure for the  $\alpha$  carbons of I-A<sup>k</sup> and each variant simulated, showing results for each of the three simulations (blue, red, orange). Thick bars represent moving averages. The similarities for each simulation demonstrate the reproducibility among the three simulations.

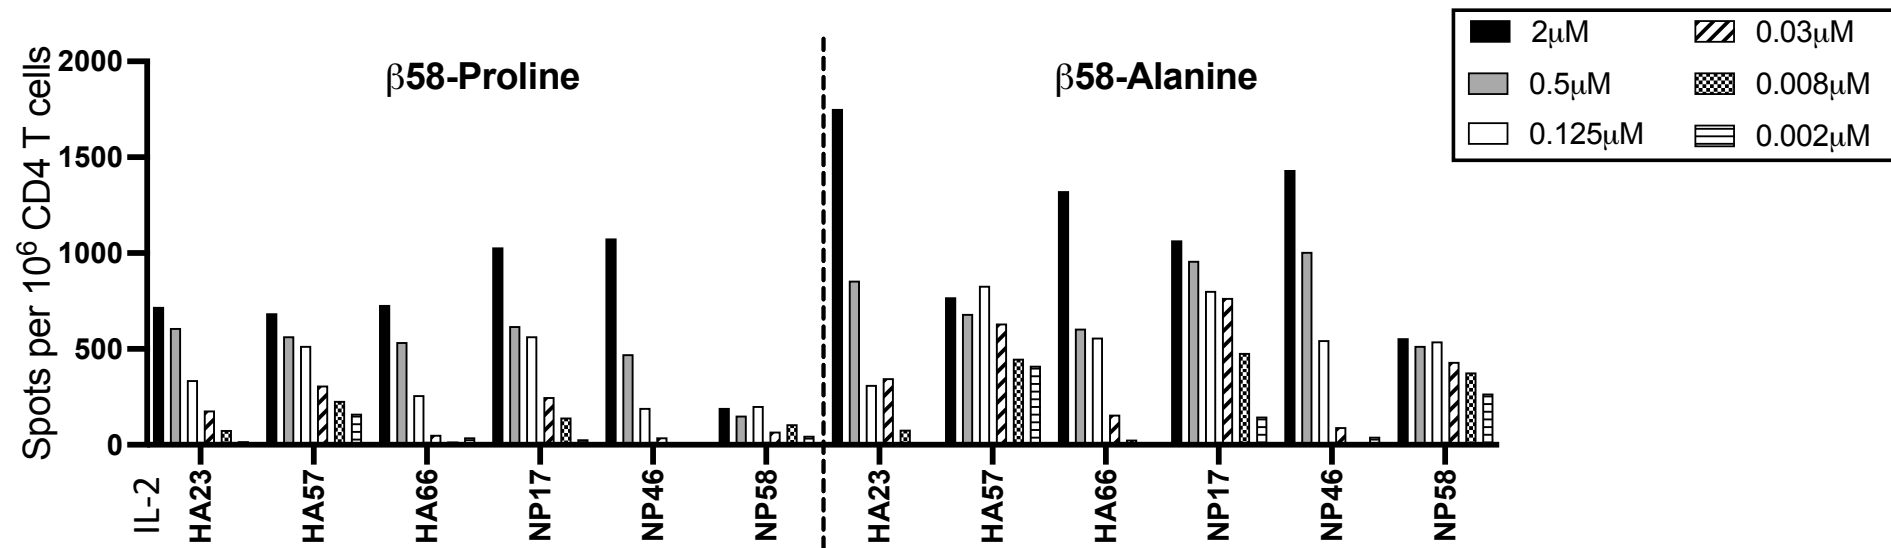

**Supplemental Figure 4. CD4 T cell recognition of APC expressing either I-A<sup>s</sup> (βPro58) or its variant I-A<sup>s</sup> (βAla58).** B10.S mice were infected with A/New Caledonia/20/99 H1N1 influenza virus and at day 10 post infection CD4 T cells were isolated from the spleen and tested for reactivity by production of IL-2, with the indicated influenza peptides, previously identified by our laboratory. Graded doses of the indicated peptide were added to the cultures and cytokine producing cells were enumerated by cytokine EliSpot assays. Results are presented as the spots per million CD4 T cells with background subtracted.
